# Supplementary material for: Nanoscale pulverization effect in double-layered MOF-derived hierarchical G/Co@C composites for boosting electromagnetic wave dissipation
Source: Royal Society of Chemistry journal article supplement (doi:10.1039/d2nr04851e), 2022-11-22
Supplement: d2nr04851e1.pdf [file d2nr04851e1.pdf]

**Nanoscale pulverization effect in double-layered MOF-derived hierarchical  
G/Co@C composites for boosting electromagnetic wave dissipation**

Guanjie Zeng<sup>a,b,c</sup>, Xiaozhong Huang<sup>a,b,c</sup>, Hailong Hu<sup>d</sup>, Jianling Yue<sup>a,b,c</sup>, Yu Liu<sup>a,b,c</sup>,  
Benhui Fan<sup>e</sup>, Huang Jia<sup>d\*</sup> and Xiu-Zhi Tang<sup>d\*</sup>

a. Powder Metallurgy Research Institute, Central South University, Changsha, Hunan  
410083, China

b. State Key Laboratory of Powder Metallurgy, Central South University, Changsha,  
Hunan 410083, China

c. Hunan Key Laboratory of Advanced Fibers and Composites, Central South  
University, Changsha, Hunan 410083, China

d. Research Institute of Aerospace Technology, Central South University, Changsha,  
Hunan 410083, China

e. Cerema, Equipe Recherche ENDSUM, 23 avenue Amiral Chauvin, 49136, Les Ponts  
de Cé, France

---

\*Corresponding Author. Tel/Fax: 0731-88837927. E-mail: [huangjia2019@csu.edu.cn](mailto:huangjia2019@csu.edu.cn)  
(Huang Jia)

\*Corresponding Author. Tel/Fax: 0731-88837927. E-mail: [xztang@csu.edu.cn](mailto:xztang@csu.edu.cn) (Xiu-  
Zhi Tang)

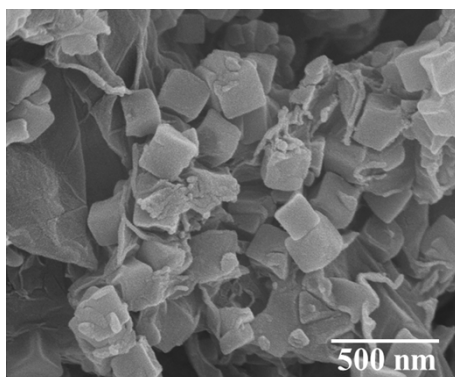

Figure S1 SEM images of GO/ZIF-8

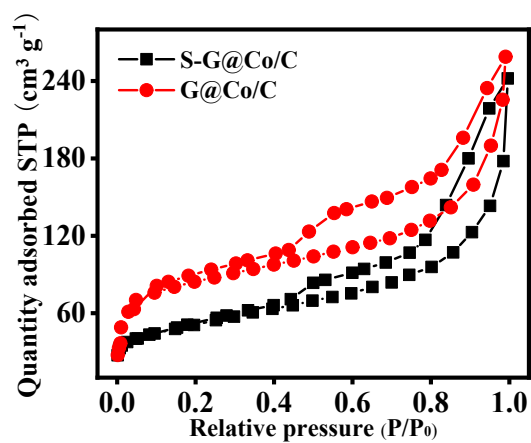

Figure S2 Nitrogen adsorption-desorption isotherms of samples

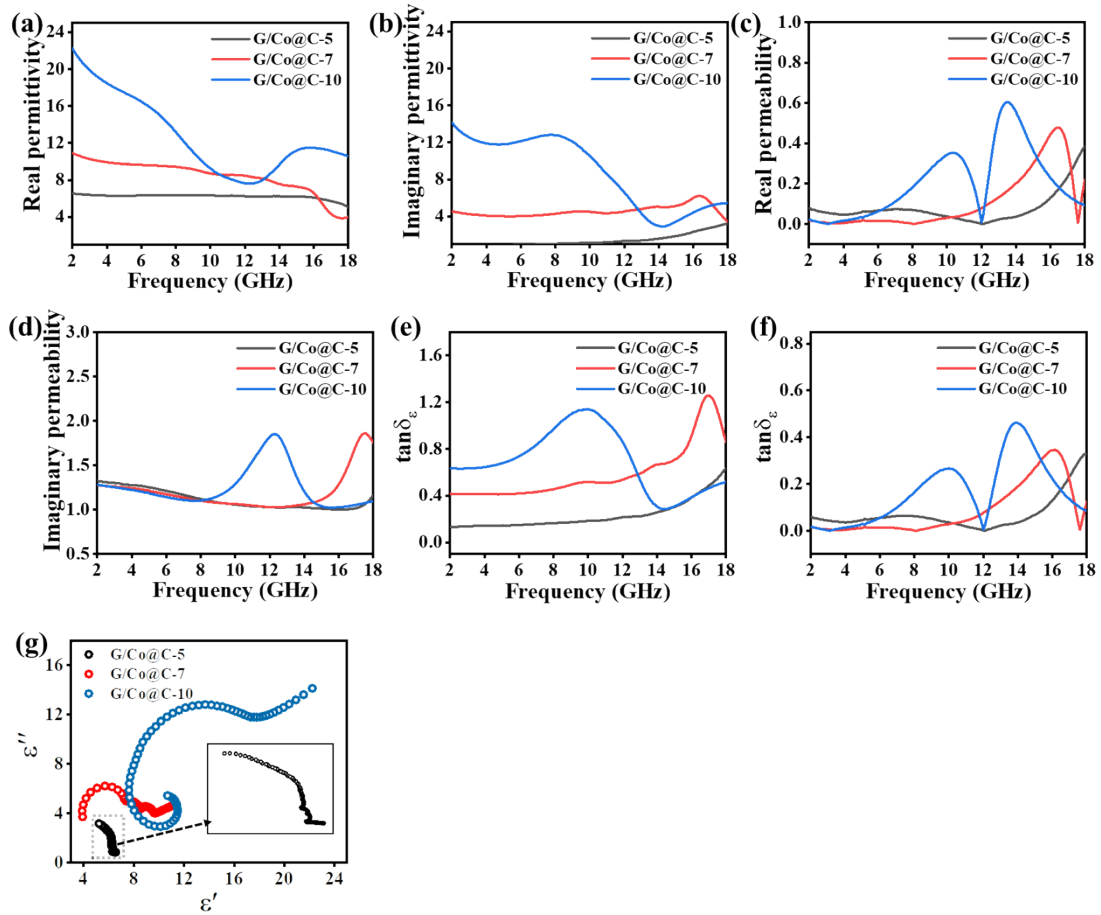

**Figure S3** Electromagnetic parameter analysis of G/Co@C with different filler contents: (a) real part and (b) imaginary part of dielectric constant; (c) real part and (d) imaginary part of permeability; tangent angle of dielectric loss(e) and magnetic loss (f); (g) Cole-Cole curves.
